# Supplementary material
Source: publisher site journal article supplement (https://www.dovepress.com/get_supplementary_file.php?f=377896.docx)
Supplement: Supplementary file 1 [file get_supplementary_file.php]

**Characteristics of oral corticosteroid users among persons with asthma on GINA step 3 therapy and above: a cross-sectional study in Portuguese community pharmacies**

**Supplementary materials**

Table S1 – **Patient selection criteria – Classification of total daily ICS doses, according to INN, and eligible controller treatment** (screening and recruitment)

| **Inhaled Corticosteroid** | **Total daily dose (μg/day)** | | |
| --- | --- | --- | --- |
| **Low** | **Medium** | **High** |
| **Budesonide (DPI/ pMDI)** | [200; 400] | ]400; 800] | ]800; +∞[ |
| **Fluticasone furoate (DPI)** | 100 | | 200 |
| **Fluticasone propionate (DPI/ pMDI)** | [100; 250] | ]250; 500] | ]500; +∞[ |
| **Eligible controller treatment:**   - Long-acting muscarinic antagonist (LAMA) - Leukotriene receptor antagonist (LTRA) | | | |

**Legend:** INN: international nonproprietary name; DPI: dry powder inhaler; pMDI: pressurized metered dose inhaler

Table S2 – **Patient selection criteria – Classification of total daily ICS doses, according to INN, and eligible controller treatment** (analysis).

| **Inhaled Corticosteroid** | **Total daily dose (μg/day)** | | |
| --- | --- | --- | --- |
| **Low** | **Medium** | **High** |
| **Budesonide (DPI/ pMDI)** | [200; 400[ | [400; 800[ | [800; +∞[ |
| **Fluticasone furoate (DPI)** | 100 | | 200 |
| **Fluticasone propionate (DPI/ pMDI)** | [100; 250[ | [250; 500[ | [500; +∞[ |
| **Eligible controller treatment:**   - Long-acting muscarinic antagonist (LAMA) - Leukotriene receptor antagonist (LTRA) - Short-acting muscarinic antagonist (SAMA) - Xanthine - Ketotifen | | | |

**Legend:** INN: international nonproprietary name; DPI: dry powder inhaler; pMDI: pressurized metered dose inhaler

Table S3 – **Equivalent dosages of Oral Corticosteroids**(E1, E2)

| **Drug** | **Equivalent dosage (mg)** |
| --- | --- |
| Budesonide | 0.375 |
| Deflazacort | 7.5 |
| Methylprednisolone | 4 |
| Prednisolone | 5 |

Table S4 – **Patient characteristics associated with OCS use, according to the exposure to OCS**

|  | **Low-dose users**  **(<2.5mg prednisolone/day/year)**  **n=42 (100%)** | **High-dose users**  **(≥2.5mg prednisolone/day/year)**  **n=23 (100%)** |
| --- | --- | --- |
| **Female sex, n (%)** | 32 (76.2%) | 14 (60.9%) |
| **Age (years), average (SD)** | 53.5 (16.5) | 15.9 (60.6) |
| **Age (years) , n (%)** |  |  |
| ≤65 years | 33 (78.6%) | 11 (47.8%) |
| >65 years | 9 (21.4%) | 12 (52.2%) |
| **BMI (kg/cm2)‡, average (SD),** | 0.6 (0.9) | 0.6 (0.9) |
| **Smoking status‡, n (%)** |  |  |
| Nonsmoker (never smoked)/ Second-hand smoker | 28 (66.7%) | 15 (65.2%) |
| Ex-smoker | 5 (11.9%) | 5 (21.7%) |
| Smoker | 7 (16.7%) | 0 (0.0%) |
| **GINA step, n (%)** |  |  |
| Step 3 | 3 (7.1%) | 0 (0.0%) |
| Step 4 | 21 (50.0%) | 7 (30.4%) |
| Step 5 | 18 (42.9%) | 16 (69.6%) |
| **Self-reported adherence to ICS-LABA [If current user]‡ , n (%)** |  |  |
| ‘I use it every day’ | 38 (95.0%) | 21 (95.5%) |
| Other | 2 (5.0%) | 1 (4.5%) |
| **Comorbidities [YES]†, n (%)** |  |  |
| Anxiety | 16 (38.1%) | 11 (47.8%) |
| Rhinitis | 18 (42.9%) | 10 (43.5%) |
| Hypertension | 12 (28.6%) | 9 (39.1%) |
| Sinusitis | 14 (33.3%) | 9 (39.1%) |
| Depression | 8 (19.0%) | 7 (30.4%) |
| Conjunctivitis | 9 (21.4%) | 6 (26.1%) |
| Osteoporosis | 6 (14.3%) | 9 (39.1%) |
| Diabetes | 2 (4.8%) | 4 (17.4%) |
| Sleep apnea | 3 (7.1%) | 5 (21.7%) |
| Cataracts | 4 (9.5%) | 3 (13.0%) |
| Gastrointestinal Disease | 5 (11.9%) | 3 (13.0%) |
| Arthritis | 1 (2.4%) | 6 (26.1%) |
| Glaucoma | 0 (0.0%) | 2 (8.7%) |
| Other | 0 (0.0%) | 1 (4.3%) |
| **Routine medical appointments‡, n (%)** |  |  |
| Yes | 27 (67.5%) | 13 (65%) |
| **Number of routine medical appointments‡, average (SD)** | 1.4 (1.3%) | 2.3 (2.8%) |
| **Unscheduled consultations‡, n (%)** |  |  |
| Yes | 15 (37.5%) | 7 (35%) |
| **Number of unscheduled consultations‡, average (SD)** | 0.6 (0.9) | 0.7 (1.1) |
| **Emergency Department visits‡, n (%)** |  |  |
| Yes | 16 (40%) | 5 (25%) |
| **Number of Emergency Department visits‡, average (SD)** | 0.6 (80%) | 0.7 (160%) |
| **[If ED visit] Hospital admissions (at least one night)** |  |  |
| Yes | 3 (18.8%) | 0 (0.0%) |
| **Patients with urgent healthcare resource utilization (Unscheduled consultations and/or ED visits)‡, n (%)** | 23 (57.5%) | 10 (50%) |
| **Patients with no healthcare resource use (any kind)‡, n (%)** | 7 (17.5%) | 3 (15.0%) |
| **CARAT score‡, average (SD)** | 16.1 (7.2) | 16.8 (7.1) |

**Legend: ‡**Missing data=5; **†**Missing data=18

**References**

E1. Lefebvre P, Duh MS, Lafeuille MH, Gozalo L, Desai U, Robitaille MN, et al. Acute and chronic systemic corticosteroid-related complications in patients with severe asthma [Supplementary material: eTable 1]. Journal of Allergy and Clinical Immunology. 2015 Dec 1;136(6):1488–95.

E2. Parente L. Deflazacort: Therapeutic index, relative potency and equivalent doses versus other corticosteroids. BMC Pharmacology and Toxicology. 2017;18(1).
